# Supplementary material for: การพฒนากลยทธพาณชยอเลกทรอนกสสำหรบธรกจนำเทยวในประเทศไทย The Development of Electronic Commerce Strategy for Tour Business in Thailand
Source: Royal Society of Chemistry journal article supplement (doi:10.1039/c5dt03937a), 2009-01-01
Supplement: c5dt03937a1.pdf [file c5dt03937a1.pdf]

## Supporting Information for

### Rare-earth metal bis(silylamide) complexes supported by mono-dentate arylamido ligand: synthesis, reactivity, and catalyst precursors in living *cis*-1,4- selective polymerization of isoprene

Liqin Shi<sup>1,3</sup>, Qi Su<sup>2</sup>, Jue chen,<sup>2</sup> Xiaonian Li<sup>3</sup> and Yunjie Luo<sup>2,\*</sup>

1. Ningbo Polytechnic, Ningbo 315800, P. R. China

2. Organometallic Chemistry Laboratory, Ningbo Institute of Technology, Zhejiang

University, Ningbo 315100, P. R. China

3. Zhejiang University of Technology, Hangzhou 310032, P. R. China

Corresponding author: E-mail: [lyj@nit.zju.edu.cn](mailto:lyj@nit.zju.edu.cn)

Tel: +86-574-88130085

Fax: +86-574-88130130

## Contents

- SFig. 1. <sup>1</sup>H NMR spectrum of [2,6-*i*Pr<sub>2</sub>C<sub>6</sub>H<sub>3</sub>N(SiMe<sub>3</sub>)]Y[N(SiHMe<sub>2</sub>)<sub>2</sub>]<sub>2</sub>(THF) (**1**)  
SFig. 2. <sup>13</sup>C NMR spectrum of [2,6-*i*Pr<sub>2</sub>C<sub>6</sub>H<sub>3</sub>N(SiMe<sub>3</sub>)]Y[N(SiHMe<sub>2</sub>)<sub>2</sub>]<sub>2</sub>(THF) (**1**)  
SFig. 3. <sup>1</sup>H NMR spectrum of [2,6-*i*Pr<sub>2</sub>C<sub>6</sub>H<sub>3</sub>N(SiMe<sub>3</sub>)]Lu[N(SiHMe<sub>2</sub>)<sub>2</sub>]<sub>2</sub>(THF) (**2**)  
Sfig. 4. <sup>13</sup>C NMR spectrum of [2,6-*i*Pr<sub>2</sub>C<sub>6</sub>H<sub>3</sub>N(SiMe<sub>3</sub>)]Lu[N(SiHMe<sub>2</sub>)<sub>2</sub>]<sub>2</sub>(THF) (**2**)  
SFig. 5. <sup>1</sup>H NMR spectrum of [2,6-*i*Pr<sub>2</sub>C<sub>6</sub>H<sub>3</sub>N(SiMe<sub>3</sub>)]La[N(SiHMe<sub>2</sub>)<sub>2</sub>]<sub>2</sub>(THF) (**3**)  
SFig. 6. <sup>13</sup>C NMR spectrum of [2,6-*i*Pr<sub>2</sub>C<sub>6</sub>H<sub>3</sub>N(SiMe<sub>3</sub>)]La[N(SiHMe<sub>2</sub>)<sub>2</sub>]<sub>2</sub>(THF) (**3**)  
SFig. 7. <sup>1</sup>H NMR spectrum of [2,6-*i*Pr<sub>2</sub>C<sub>6</sub>H<sub>3</sub>N(SiMe<sub>3</sub>)]Y[(*μ*-Me)<sub>2</sub>AlMe<sub>2</sub>]<sub>2</sub> (**4**)  
SFig. 8. <sup>13</sup>C NMR spectrum of [2, 6-*i*Pr<sub>2</sub>C<sub>6</sub>H<sub>3</sub>N(SiMe<sub>3</sub>)]Y[(*μ*-Me)<sub>2</sub>AlMe<sub>2</sub>]<sub>2</sub> (**4**)  
SFig. 9. <sup>1</sup>H NMR spectrum of [2,6-*i*Pr<sub>2</sub>C<sub>6</sub>H<sub>3</sub>N(SiMe<sub>3</sub>)]Lu[(*μ*-Me)<sub>2</sub>AlMe<sub>2</sub>]<sub>2</sub> (**5**)  
SFig. 10. <sup>13</sup>C NMR spectrum of [2,6-*i*Pr<sub>2</sub>C<sub>6</sub>H<sub>3</sub>N(SiMe<sub>3</sub>)]Lu[(*μ*-Me)<sub>2</sub>AlMe<sub>2</sub>]<sub>2</sub> (**5**)  
SFig. 11. <sup>1</sup>H NMR spectrum of [2,6-*i*Pr<sub>2</sub>C<sub>6</sub>H<sub>3</sub>N(SiMe<sub>3</sub>)]La[(*μ*-Me)<sub>2</sub>AlMe<sub>2</sub>]<sub>2</sub> (**6**)  
SFig. 12. <sup>13</sup>C NMR spectrum of [2,6-*i*Pr<sub>2</sub>C<sub>6</sub>H<sub>3</sub>N(SiMe<sub>3</sub>)]La[(*μ*-Me)<sub>2</sub>AlMe<sub>2</sub>]<sub>2</sub> (**6**)  
SFig. 13. Molecular structure of [2,6-*i*Pr<sub>2</sub>C<sub>6</sub>H<sub>3</sub>N(SiMe<sub>3</sub>)]Y[(*μ*-Me)<sub>2</sub>AlMe<sub>2</sub>]<sub>2</sub> (**4**).  
SFig. 14. <sup>1</sup>H NMR spectrum of representative polymer  
SFig. 15. GPC curve of representative polymer

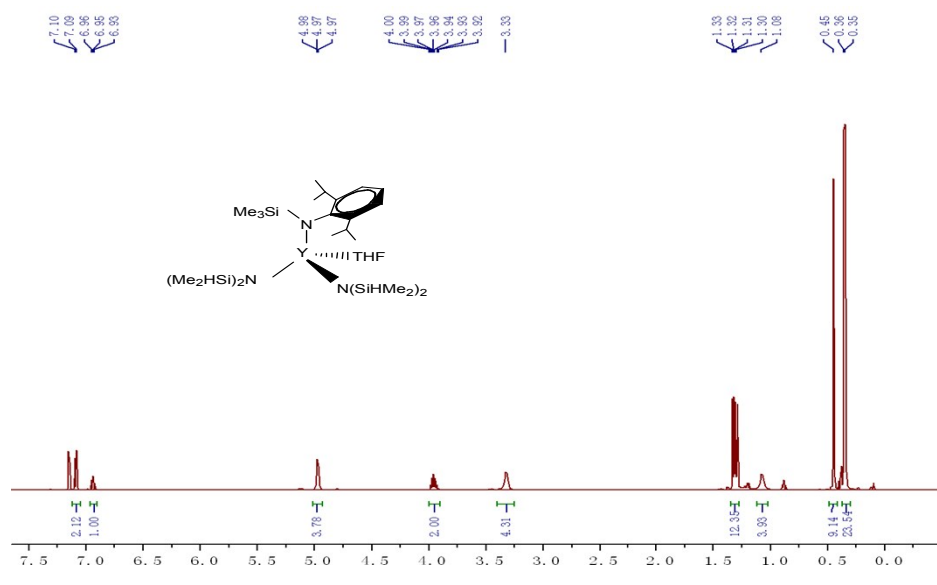

SFig. 1.  $^1\text{H}$  NMR spectrum of  $[2,6\text{-}i\text{Pr}_2\text{C}_6\text{H}_3\text{N}(\text{SiMe}_3)]\text{Y}[\text{N}(\text{SiHMe}_2)_2]_2(\text{THF})$  (1)

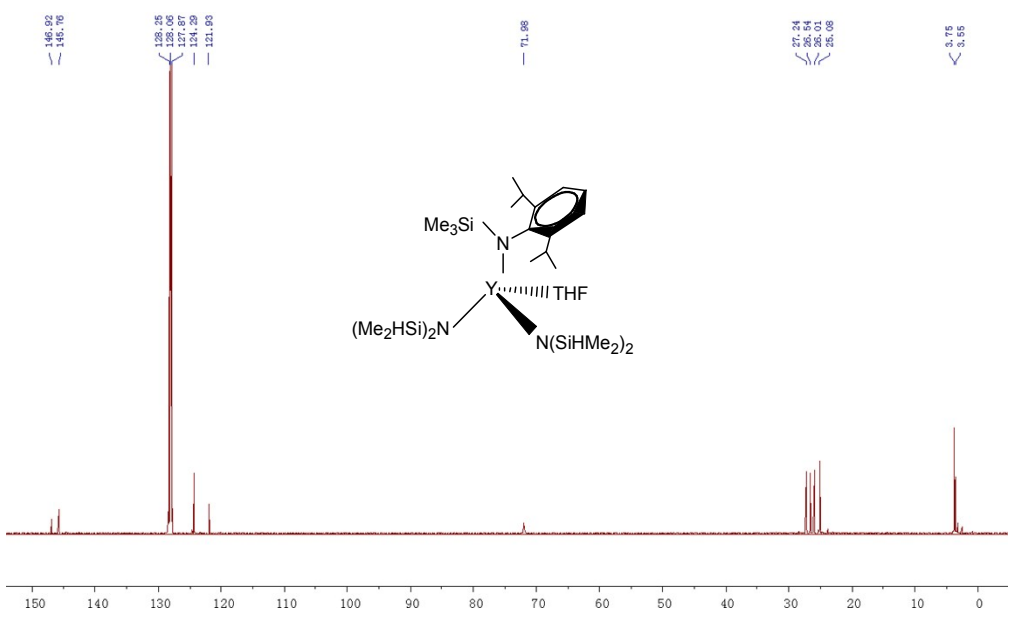

SFig. 2.  $^{13}\text{C}$  NMR spectrum of  $[2,6\text{-}i\text{Pr}_2\text{C}_6\text{H}_3\text{N}(\text{SiMe}_3)]\text{Y}[\text{N}(\text{SiHMe}_2)_2]_2(\text{THF})$  (1)

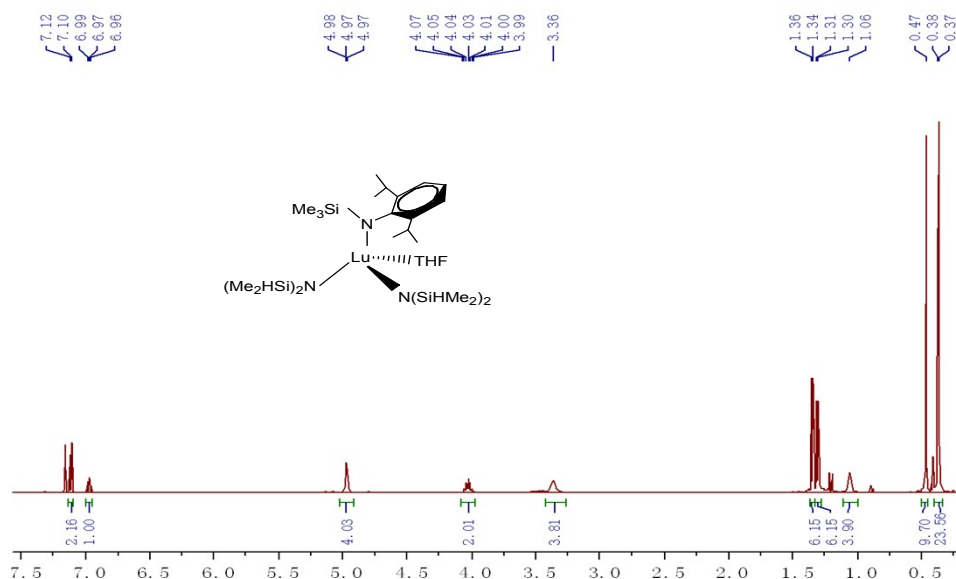

Sfig. 3. <sup>1</sup>H NMR spectrum of [2,6-*Pr*<sub>2</sub>C<sub>6</sub>H<sub>3</sub>N(SiMe<sub>3</sub>)]Lu[N(SiHMe<sub>2</sub>)<sub>2</sub>]<sub>2</sub>(THF) (2)

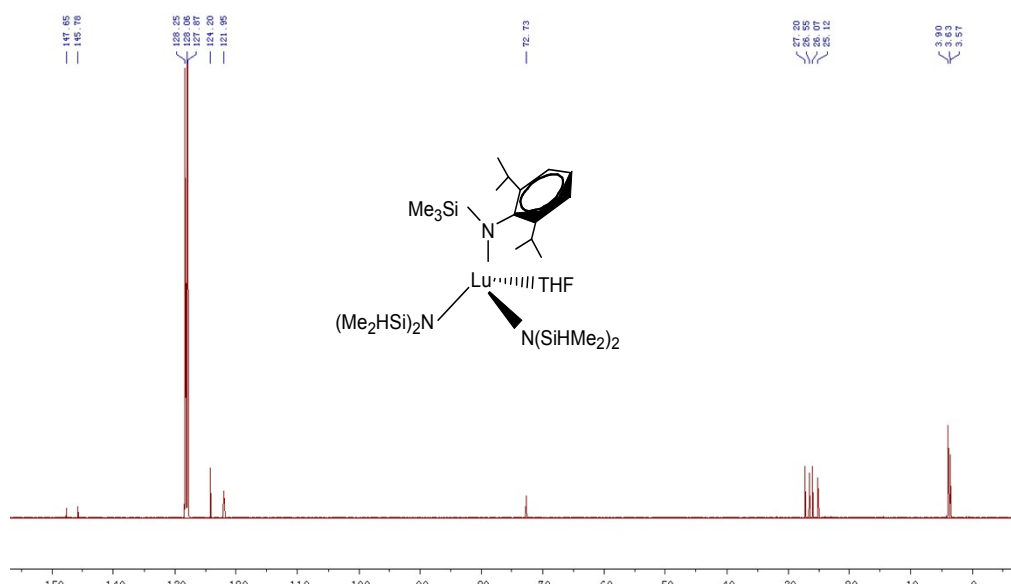

Sfig. 4. <sup>13</sup>C NMR spectrum of [2,6-*Pr*<sub>2</sub>C<sub>6</sub>H<sub>3</sub>N(SiMe<sub>3</sub>)]Lu[N(SiHMe<sub>2</sub>)<sub>2</sub>]<sub>2</sub>(THF) (2)

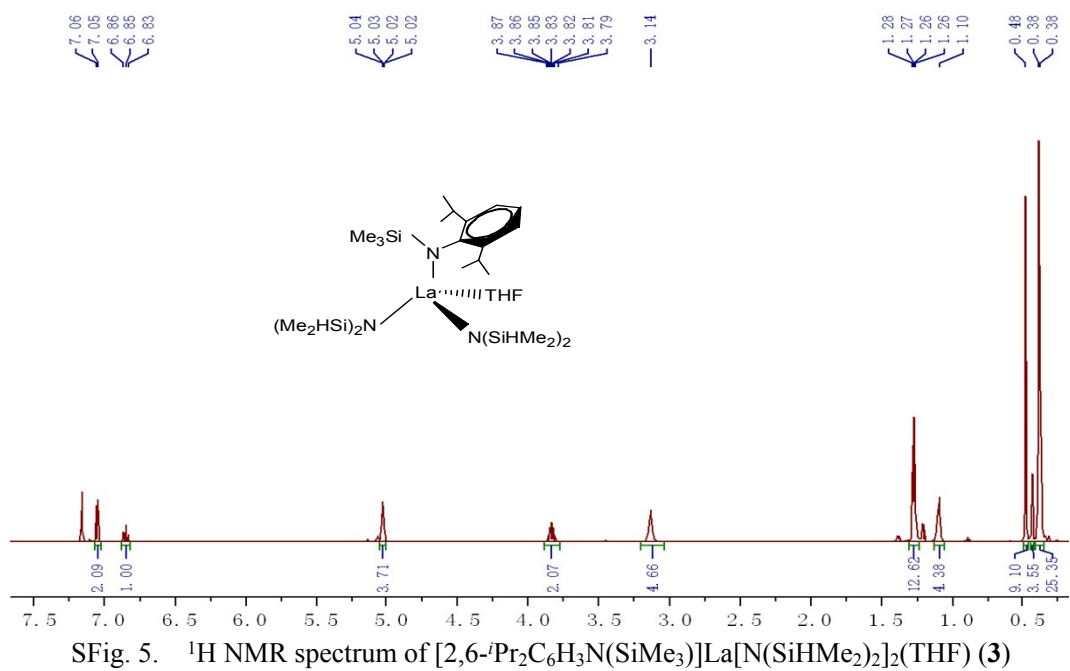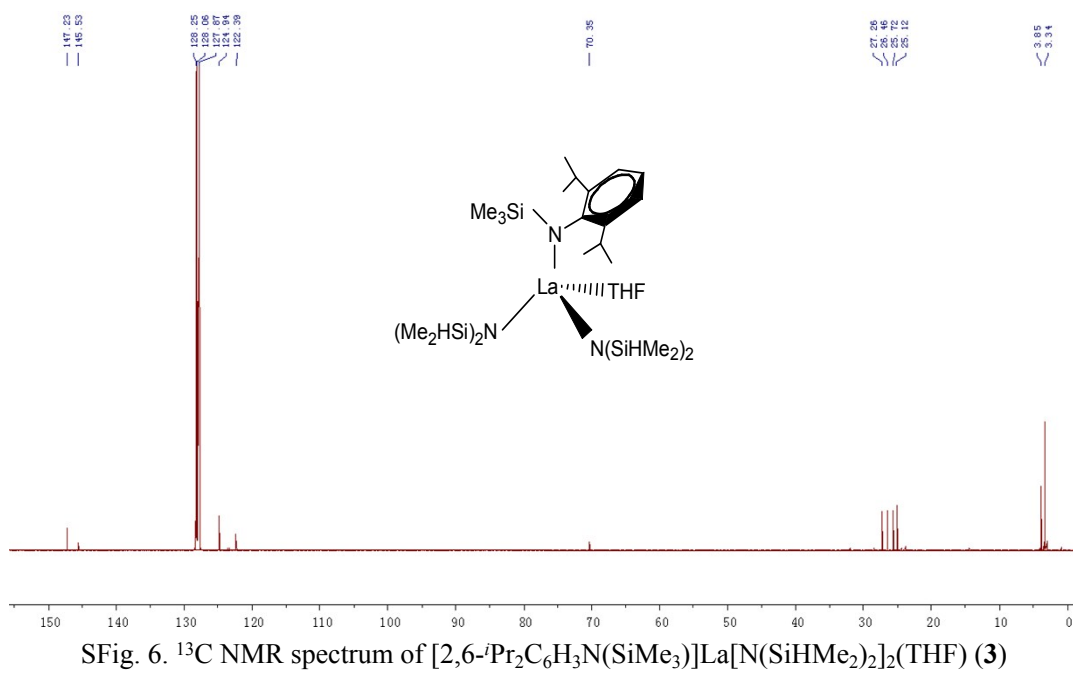

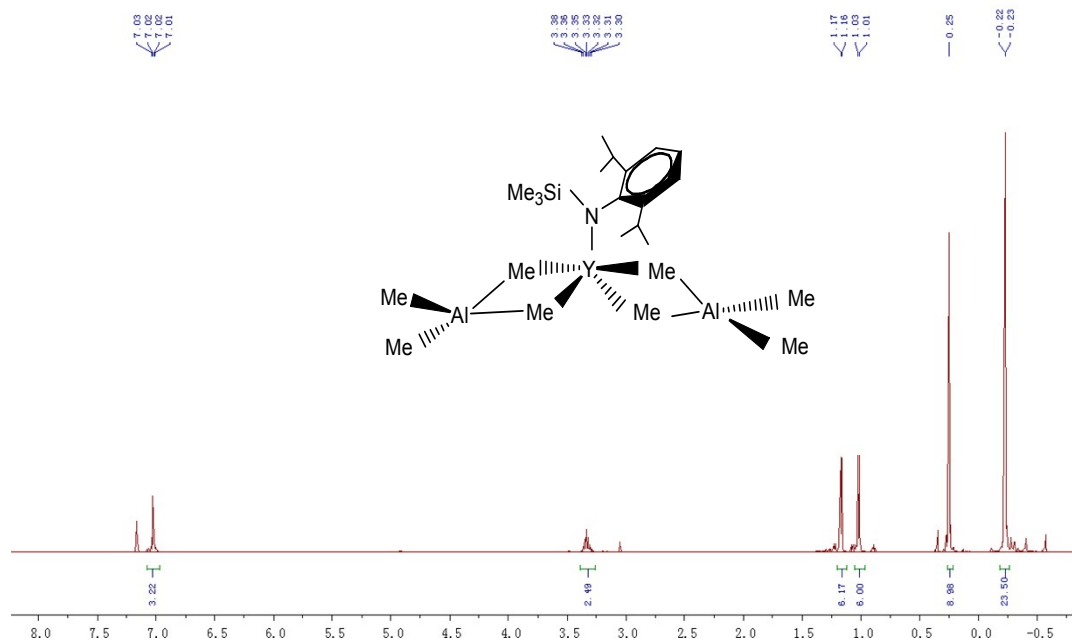

SFig. 7.  $^1\text{H}$  NMR spectrum of  $[2,6\text{-}i\text{Pr}_2\text{C}_6\text{H}_3\text{N}(\text{SiMe}_3)]\text{Y}[(\mu\text{-Me})_2\text{AlMe}_2]_2$  (4)

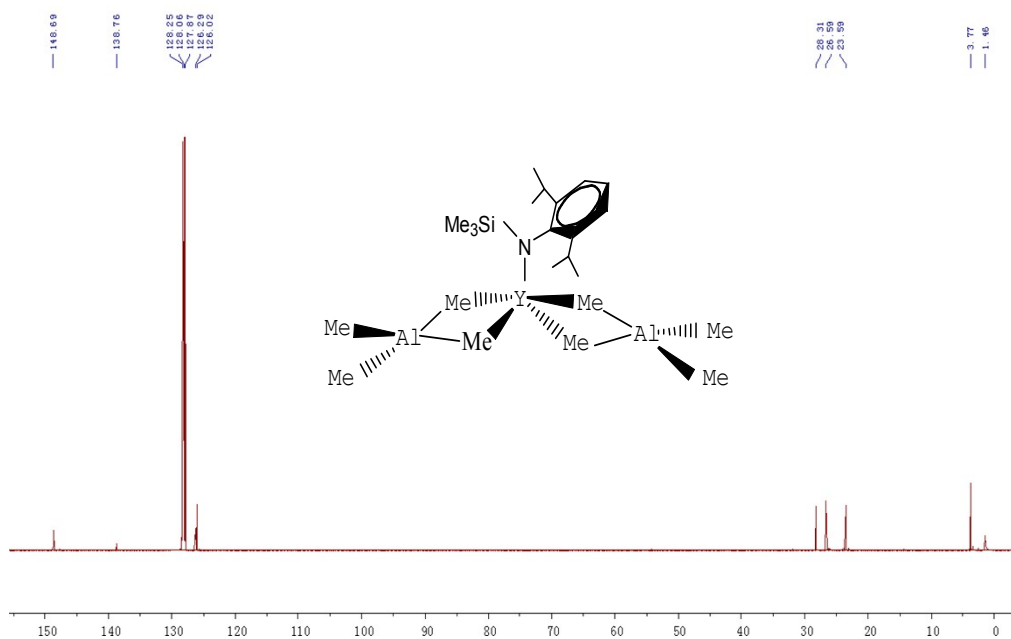

SFig. 8.  $^{13}\text{C}$  NMR spectrum of  $[2,6\text{-}i\text{Pr}_2\text{C}_6\text{H}_3\text{N}(\text{SiMe}_3)]\text{Y}[(\mu\text{-Me})_2\text{AlMe}_2]_2$  (4)

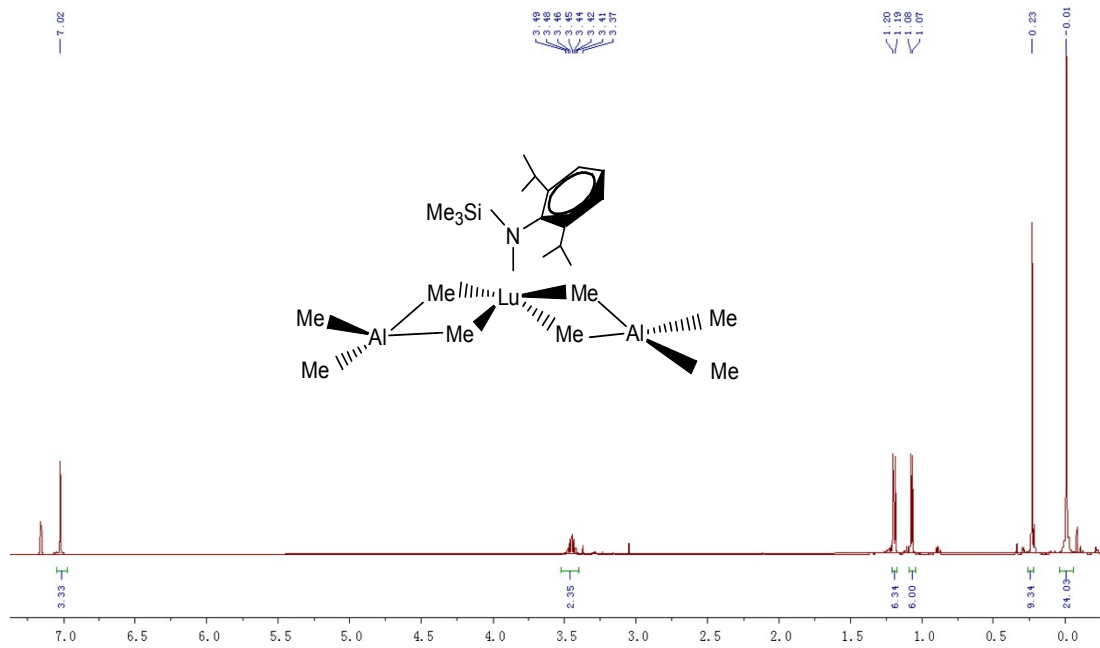

SFig. 9. <sup>1</sup>H NMR spectrum of [2,6-*i*-Pr<sub>2</sub>C<sub>6</sub>H<sub>3</sub>N(SiMe<sub>3</sub>)]Lu[(μ-Me)<sub>2</sub>AlMe<sub>2</sub>]<sub>2</sub> (**5**)

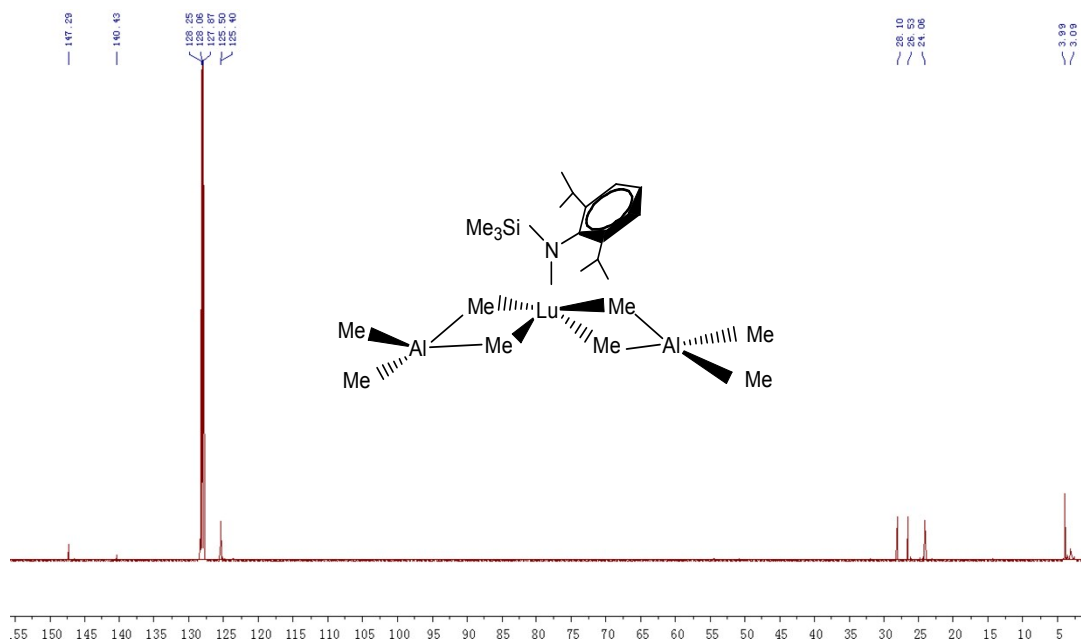

SFig. 10. <sup>13</sup>C NMR spectrum of [2,6-*i*-Pr<sub>2</sub>C<sub>6</sub>H<sub>3</sub>N(SiMe<sub>3</sub>)]Lu[(μ-Me)<sub>2</sub>AlMe<sub>2</sub>]<sub>2</sub> (**5**)

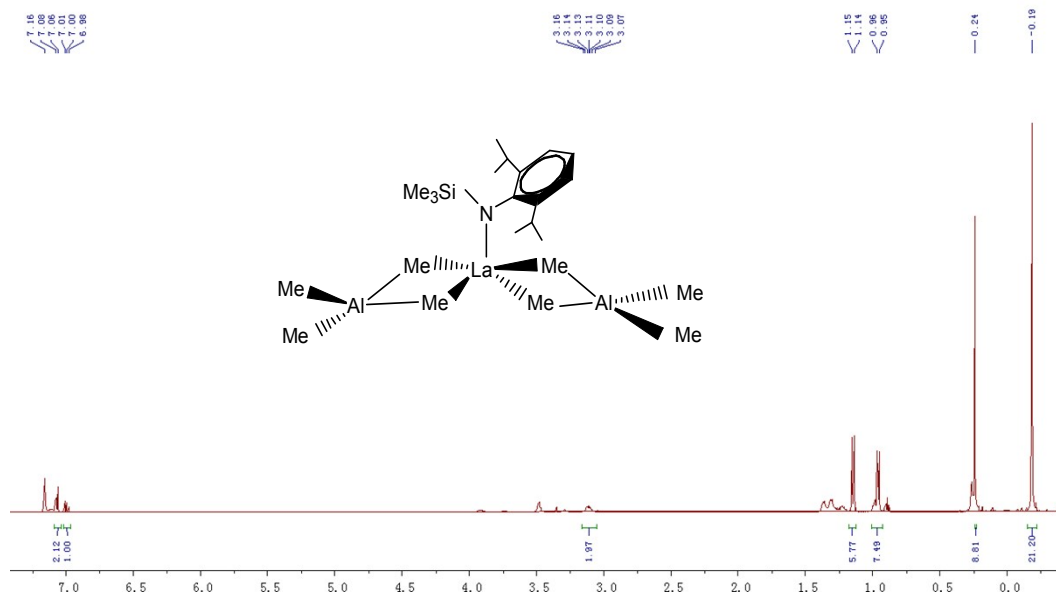

SFig. 11.  $^1\text{H}$  NMR spectrum of  $[2,6\text{-}i\text{Pr}_2\text{C}_6\text{H}_3\text{N}(\text{SiMe}_3)]\text{La}[(\mu\text{-Me})_2\text{AlMe}_2]_2$  (6)

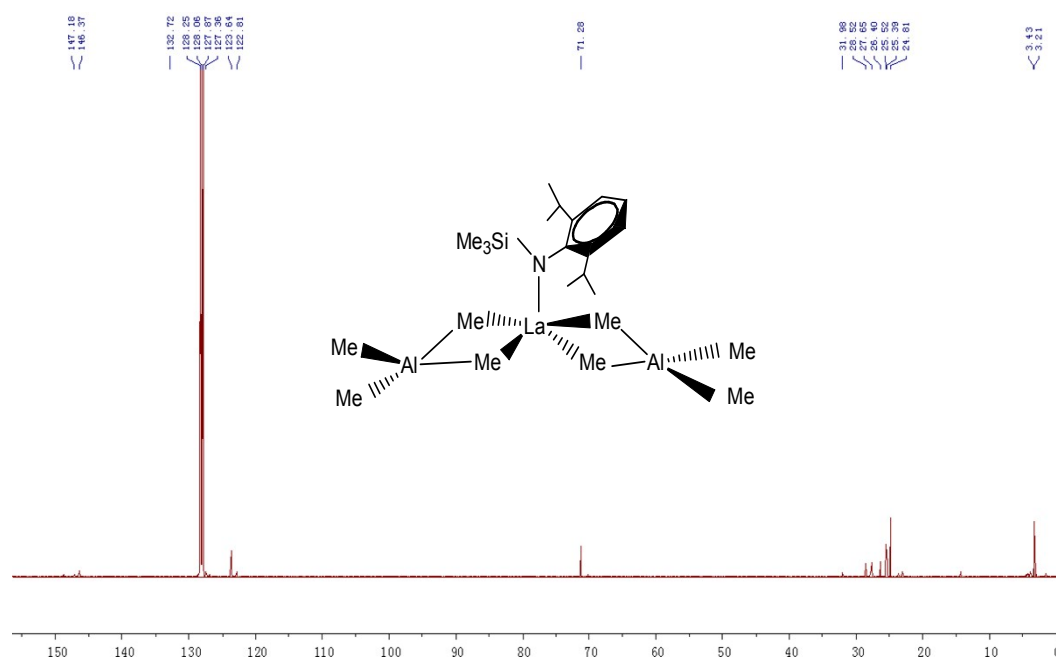

SFig. 12  $^{13}\text{C}$  NMR spectrum of  $[2,6\text{-}i\text{Pr}_2\text{C}_6\text{H}_3\text{N}(\text{SiMe}_3)]\text{La}[(\mu\text{-Me})_2\text{AlMe}_2]_2$  (6)

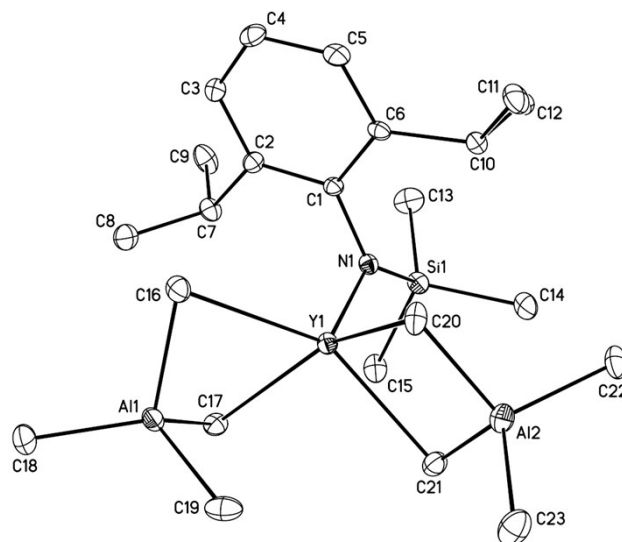

SFig. 13. Molecular structure of **4**. Hydrogen atoms (except those on SiH) are omitted for clarity.

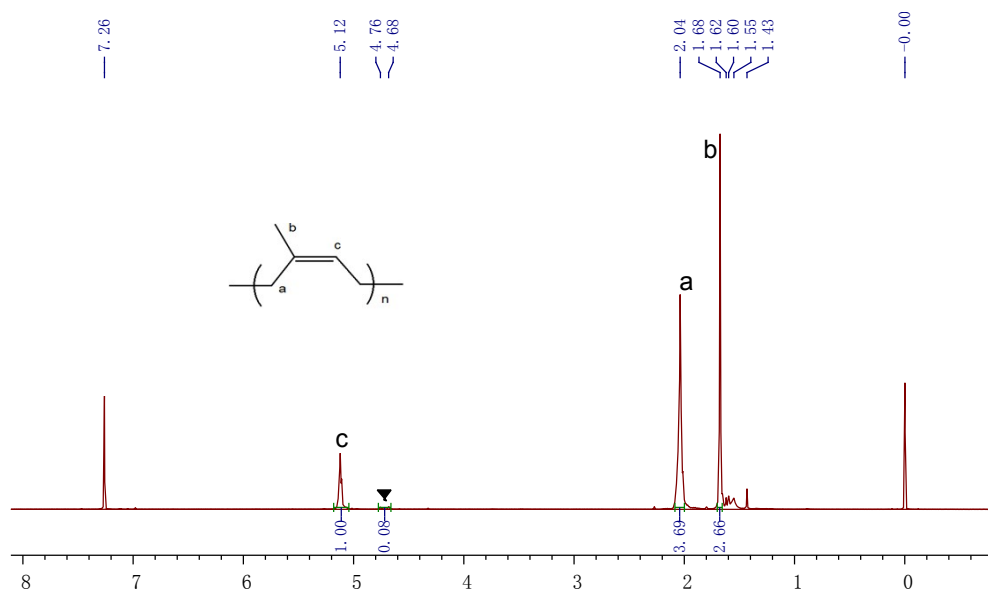

SFig. 14.  $^1\text{H}$  NMR spectrum of representative polymer

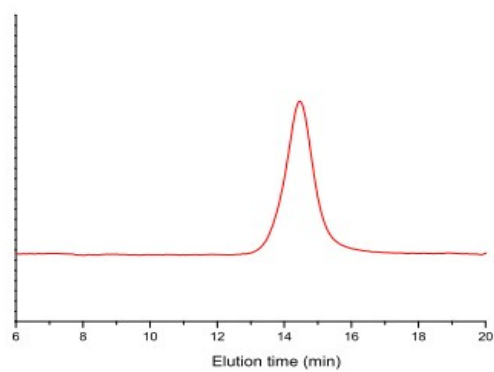

SFig. 15. GPC curve of representative polymer
